# Supplementary material for: Understanding variations in downwelling longwave radiation using Brutsaert's equation
Source: Copernicus journal article supplement (doi:10.5194/egusphere-2023-451), 2023-04-24
Supplement: Supplementary file 1 [file egusphere-2023-451-supplement.pdf]

**Table S1.** FLUXNET stations used in this study, including their FLUXNET ID, latitude, longitude, the years used in the analysis and the doi reference to the site.

| <b>No.</b> | <b>FLUXNETID</b> | <b>Lat</b> | <b>Lon</b> | <b>Begin Year</b> | <b>End Year</b> | <b>DOI</b>                                                                              |
|------------|------------------|------------|------------|-------------------|-----------------|-----------------------------------------------------------------------------------------|
| 1          | AR-SLu           | -33.46     | -66.46     | 2009              | 2011            | <a href="https://doi.org/10.18140/flx/1440191">https://doi.org/10.18140/flx/1440191</a> |
| 2          | AR-Vir           | -28.24     | -56.19     | 2009              | 2012            | <a href="https://doi.org/10.18140/flx/1440192">https://doi.org/10.18140/flx/1440192</a> |
| 3          | AT-Neu           | 47.12      | 11.32      | 2002              | 2012            | <a href="https://doi.org/10.18140/flx/1440121">https://doi.org/10.18140/flx/1440121</a> |
| 4          | AU-Ade           | -13.08     | 131.12     | 2007              | 2009            | <a href="https://doi.org/10.18140/flx/1440193">https://doi.org/10.18140/flx/1440193</a> |
| 5          | AU-ASM           | -22.28     | 133.25     | 2010              | 2014            | <a href="https://doi.org/10.18140/flx/1440194">https://doi.org/10.18140/flx/1440194</a> |
| 6          | AU-Cpr           | -34.00     | 140.59     | 2010              | 2014            | <a href="https://doi.org/10.18140/flx/1440195">https://doi.org/10.18140/flx/1440195</a> |
| 7          | AU-Cum           | -33.61     | 150.72     | 2012              | 2014            | <a href="https://doi.org/10.18140/flx/1440196">https://doi.org/10.18140/flx/1440196</a> |
| 8          | AU-DaP           | -14.06     | 131.32     | 2007              | 2013            | <a href="https://doi.org/10.18140/flx/1440123">https://doi.org/10.18140/flx/1440123</a> |
| 9          | AU-DaS           | -14.16     | 131.39     | 2008              | 2014            | <a href="https://doi.org/10.18140/flx/1440122">https://doi.org/10.18140/flx/1440122</a> |
| 10         | AU-Dry           | -15.26     | 132.37     | 2008              | 2014            | <a href="https://doi.org/10.18140/flx/1440197">https://doi.org/10.18140/flx/1440197</a> |
| 11         | AU-Emr           | -23.86     | 148.47     | 2011              | 2013            | <a href="https://doi.org/10.18140/flx/1440198">https://doi.org/10.18140/flx/1440198</a> |
| 12         | AU-Fog           | -12.55     | 131.31     | 2006              | 2008            | <a href="https://doi.org/10.18140/flx/1440124">https://doi.org/10.18140/flx/1440124</a> |
| 13         | AU-Gin           | -31.38     | 115.71     | 2011              | 2014            | <a href="https://doi.org/10.18140/flx/1440199">https://doi.org/10.18140/flx/1440199</a> |
| 14         | AU-GWW           | -30.19     | 120.65     | 2013              | 2014            | <a href="https://doi.org/10.18140/flx/1440200">https://doi.org/10.18140/flx/1440200</a> |
| 15         | AU-How           | -12.49     | 131.15     | 2001              | 2014            | <a href="https://doi.org/10.18140/flx/1440125">https://doi.org/10.18140/flx/1440125</a> |
| 16         | AU-Lox           | -34.47     | 140.66     | 2008              | 2009            | <a href="https://doi.org/10.18140/flx/1440247">https://doi.org/10.18140/flx/1440247</a> |
| 17         | AU-RDF           | -14.56     | 132.48     | 2011              | 2013            | <a href="https://doi.org/10.18140/flx/1440201">https://doi.org/10.18140/flx/1440201</a> |
| 18         | AU-Rig           | -36.65     | 145.58     | 2011              | 2014            | <a href="https://doi.org/10.18140/flx/1440202">https://doi.org/10.18140/flx/1440202</a> |
| 19         | AU-Rob           | -17.12     | 145.63     | 2014              | 2014            | <a href="https://doi.org/10.18140/flx/1440203">https://doi.org/10.18140/flx/1440203</a> |
| 20         | AU-Stp           | -17.15     | 133.35     | 2008              | 2014            | <a href="https://doi.org/10.18140/flx/1440204">https://doi.org/10.18140/flx/1440204</a> |
| 21         | AU-TTE           | -22.29     | 133.64     | 2012              | 2014            | <a href="https://doi.org/10.18140/flx/1440205">https://doi.org/10.18140/flx/1440205</a> |
| 22         | AU-Tum           | -35.66     | 148.15     | 2001              | 2014            | <a href="https://doi.org/10.18140/flx/1440126">https://doi.org/10.18140/flx/1440126</a> |
| 23         | AU-Wac           | -37.43     | 145.19     | 2005              | 2008            | <a href="https://doi.org/10.18140/flx/1440127">https://doi.org/10.18140/flx/1440127</a> |
| 24         | AU-Whr           | -36.67     | 145.03     | 2011              | 2014            | <a href="https://doi.org/10.18140/flx/1440206">https://doi.org/10.18140/flx/1440206</a> |
| 25         | AU-Wom           | -37.42     | 144.09     | 2010              | 2014            | <a href="https://doi.org/10.18140/flx/1440207">https://doi.org/10.18140/flx/1440207</a> |
| 26         | AU-Ync           | -34.99     | 146.29     | 2012              | 2014            | <a href="https://doi.org/10.18140/flx/1440208">https://doi.org/10.18140/flx/1440208</a> |
| 27         | BE-Bra           | 51.31      | 4.52       | 1996              | 2014            | <a href="https://doi.org/10.18140/flx/1440128">https://doi.org/10.18140/flx/1440128</a> |
| 28         | BE-Lon           | 50.55      | 4.75       | 2004              | 2014            | <a href="https://doi.org/10.18140/flx/1440129">https://doi.org/10.18140/flx/1440129</a> |
| 29         | BE-Vie           | 50.31      | 6.00       | 1996              | 2014            | <a href="https://doi.org/10.18140/flx/1440130">https://doi.org/10.18140/flx/1440130</a> |
| 30         | BR-Sa1           | -2.86      | -54.96     | 2002              | 2011            | <a href="https://doi.org/10.18140/flx/1440032">https://doi.org/10.18140/flx/1440032</a> |
| 31         | BR-Sa3           | -3.02      | -54.97     | 2000              | 2004            | <a href="https://doi.org/10.18140/flx/1440033">https://doi.org/10.18140/flx/1440033</a> |
| 32         | CA-Gro           | 48.22      | -82.16     | 2003              | 2014            | <a href="https://doi.org/10.18140/flx/1440034">https://doi.org/10.18140/flx/1440034</a> |
| 33         | CA-Man           | 55.88      | -98.48     | 1994              | 2008            | <a href="https://doi.org/10.18140/flx/1440035">https://doi.org/10.18140/flx/1440035</a> |
| 34         | CA-NS1           | 55.88      | -98.48     | 2001              | 2005            | <a href="https://doi.org/10.18140/flx/1440036">https://doi.org/10.18140/flx/1440036</a> |
| 35         | CA-NS2           | 55.91      | -98.52     | 2001              | 2005            | <a href="https://doi.org/10.18140/flx/1440037">https://doi.org/10.18140/flx/1440037</a> |
| 36         | CA-NS3           | 55.91      | -98.38     | 2001              | 2005            | <a href="https://doi.org/10.18140/flx/1440038">https://doi.org/10.18140/flx/1440038</a> |
| 37         | CA-NS4           | 55.91      | -98.38     | 2002              | 2005            | <a href="https://doi.org/10.18140/flx/1440039">https://doi.org/10.18140/flx/1440039</a> |
| 38         | CA-NS5           | 55.86      | -98.49     | 2001              | 2005            | <a href="https://doi.org/10.18140/flx/1440040">https://doi.org/10.18140/flx/1440040</a> |
| 39         | CA-NS6           | 55.92      | -98.96     | 2001              | 2005            | <a href="https://doi.org/10.18140/flx/1440041">https://doi.org/10.18140/flx/1440041</a> |
| 40         | CA-NS7           | 56.64      | -99.95     | 2002              | 2005            | <a href="https://doi.org/10.18140/flx/1440042">https://doi.org/10.18140/flx/1440042</a> |
| 41         | CA-Oas           | 53.63      | -106.20    | 1996              | 2010            | <a href="https://doi.org/10.18140/flx/1440043">https://doi.org/10.18140/flx/1440043</a> |
| 42         | CA-Obs           | 53.99      | -105.12    | 1997              | 2010            | <a href="https://doi.org/10.18140/flx/1440044">https://doi.org/10.18140/flx/1440044</a> |
| 43         | CA-Qfo           | 49.69      | -74.34     | 2003              | 2010            | <a href="https://doi.org/10.18140/flx/1440045">https://doi.org/10.18140/flx/1440045</a> |
| 44         | CA-SF1           | 54.49      | -105.82    | 2003              | 2006            | <a href="https://doi.org/10.18140/flx/1440046">https://doi.org/10.18140/flx/1440046</a> |
| 45         | CA-SF2           | 54.25      | -105.88    | 2001              | 2005            | <a href="https://doi.org/10.18140/flx/1440047">https://doi.org/10.18140/flx/1440047</a> |
| 46         | CA-SF3           | 54.09      | -106.01    | 2001              | 2006            | <a href="https://doi.org/10.18140/flx/1440048">https://doi.org/10.18140/flx/1440048</a> |

| No. | FLUXNETID | Lat   | Lon    | BeginYear | EndYear | DOI                                                                                     |
|-----|-----------|-------|--------|-----------|---------|-----------------------------------------------------------------------------------------|
| 47  | CA-TP1    | 42.66 | -80.56 | 2002      | 2014    | <a href="https://doi.org/10.18140/flx/1440050">https://doi.org/10.18140/flx/1440050</a> |
| 48  | CA-TP2    | 42.77 | -80.46 | 2002      | 2007    | <a href="https://doi.org/10.18140/flx/1440051">https://doi.org/10.18140/flx/1440051</a> |
| 49  | CA-TP3    | 42.71 | -80.35 | 2002      | 2014    | <a href="https://doi.org/10.18140/flx/1440052">https://doi.org/10.18140/flx/1440052</a> |
| 50  | CA-TP4    | 42.71 | -80.36 | 2002      | 2014    | <a href="https://doi.org/10.18140/flx/1440053">https://doi.org/10.18140/flx/1440053</a> |
| 51  | CA-TPD    | 42.64 | -80.56 | 2012      | 2014    | <a href="https://doi.org/10.18140/flx/1440112">https://doi.org/10.18140/flx/1440112</a> |
| 52  | CG-Tch    | -4.29 | 11.66  | 2006      | 2009    | <a href="https://doi.org/10.18140/flx/1440142">https://doi.org/10.18140/flx/1440142</a> |
| 53  | CH-Cha    | 47.21 | 8.41   | 2005      | 2014    | <a href="https://doi.org/10.18140/flx/1440131">https://doi.org/10.18140/flx/1440131</a> |
| 54  | CH-Dav    | 46.82 | 9.86   | 1997      | 2014    | <a href="https://doi.org/10.18140/flx/1440132">https://doi.org/10.18140/flx/1440132</a> |
| 55  | CH-Fru    | 47.12 | 8.54   | 2005      | 2014    | <a href="https://doi.org/10.18140/flx/1440133">https://doi.org/10.18140/flx/1440133</a> |
| 56  | CH-Lae    | 47.48 | 8.37   | 2004      | 2014    | <a href="https://doi.org/10.18140/flx/1440134">https://doi.org/10.18140/flx/1440134</a> |
| 57  | CH-Oe1    | 47.29 | 7.73   | 2002      | 2008    | <a href="https://doi.org/10.18140/flx/1440135">https://doi.org/10.18140/flx/1440135</a> |
| 58  | CH-Oe2    | 47.29 | 7.73   | 2004      | 2014    | <a href="https://doi.org/10.18140/flx/1440136">https://doi.org/10.18140/flx/1440136</a> |
| 59  | CN-Cha    | 42.40 | 128.10 | 2003      | 2005    | <a href="https://doi.org/10.18140/flx/1440137">https://doi.org/10.18140/flx/1440137</a> |
| 60  | CN-Cng    | 44.59 | 123.51 | 2007      | 2010    | <a href="https://doi.org/10.18140/flx/1440209">https://doi.org/10.18140/flx/1440209</a> |
| 61  | CN-Dan    | 30.50 | 91.07  | 2004      | 2005    | <a href="https://doi.org/10.18140/flx/1440138">https://doi.org/10.18140/flx/1440138</a> |
| 62  | CN-Din    | 23.17 | 112.54 | 2003      | 2005    | <a href="https://doi.org/10.18140/flx/1440139">https://doi.org/10.18140/flx/1440139</a> |
| 63  | CN-Du2    | 42.05 | 116.28 | 2006      | 2008    | <a href="https://doi.org/10.18140/flx/1440140">https://doi.org/10.18140/flx/1440140</a> |
| 64  | CN-Du3    | 42.06 | 116.28 | 2009      | 2010    | <a href="https://doi.org/10.18140/flx/1440210">https://doi.org/10.18140/flx/1440210</a> |
| 65  | CN-Ha2    | 37.61 | 101.33 | 2003      | 2005    | <a href="https://doi.org/10.18140/flx/1440211">https://doi.org/10.18140/flx/1440211</a> |
| 66  | CN-HaM    | 37.37 | 101.18 | 2002      | 2004    | <a href="https://doi.org/10.18140/flx/1440190">https://doi.org/10.18140/flx/1440190</a> |
| 67  | CN-Qia    | 26.74 | 115.06 | 2003      | 2005    | <a href="https://doi.org/10.18140/flx/1440141">https://doi.org/10.18140/flx/1440141</a> |
| 68  | CN-Sw2    | 41.79 | 111.90 | 2010      | 2012    | <a href="https://doi.org/10.18140/flx/1440212">https://doi.org/10.18140/flx/1440212</a> |
| 69  | CZ-BK1    | 49.50 | 18.54  | 2004      | 2014    | <a href="https://doi.org/10.18140/flx/1440143">https://doi.org/10.18140/flx/1440143</a> |
| 70  | CZ-BK2    | 49.49 | 18.54  | 2004      | 2012    | <a href="https://doi.org/10.18140/flx/1440144">https://doi.org/10.18140/flx/1440144</a> |
| 71  | CZ-wet    | 49.02 | 14.77  | 2006      | 2014    | <a href="https://doi.org/10.18140/flx/1440145">https://doi.org/10.18140/flx/1440145</a> |
| 72  | DE-Akm    | 53.87 | 13.68  | 2009      | 2014    | <a href="https://doi.org/10.18140/flx/1440213">https://doi.org/10.18140/flx/1440213</a> |
| 73  | DE-Geb    | 51.10 | 10.91  | 2001      | 2014    | <a href="https://doi.org/10.18140/flx/1440146">https://doi.org/10.18140/flx/1440146</a> |
| 74  | DE-Gri    | 50.95 | 13.51  | 2004      | 2014    | <a href="https://doi.org/10.18140/flx/1440147">https://doi.org/10.18140/flx/1440147</a> |
| 75  | DE-Hai    | 51.08 | 10.45  | 2000      | 2012    | <a href="https://doi.org/10.18140/flx/1440148">https://doi.org/10.18140/flx/1440148</a> |
| 76  | DE-Kli    | 50.89 | 13.52  | 2004      | 2014    | <a href="https://doi.org/10.18140/flx/1440149">https://doi.org/10.18140/flx/1440149</a> |
| 77  | DE-Lkb    | 49.10 | 13.30  | 2009      | 2013    | <a href="https://doi.org/10.18140/flx/1440214">https://doi.org/10.18140/flx/1440214</a> |
| 78  | DE-Lnf    | 51.33 | 10.37  | 2002      | 2012    | <a href="https://doi.org/10.18140/flx/1440150">https://doi.org/10.18140/flx/1440150</a> |
| 79  | DE-Obe    | 50.78 | 13.72  | 2008      | 2014    | <a href="https://doi.org/10.18140/flx/1440151">https://doi.org/10.18140/flx/1440151</a> |
| 80  | DE-RuR    | 50.62 | 6.30   | 2011      | 2014    | <a href="https://doi.org/10.18140/flx/1440215">https://doi.org/10.18140/flx/1440215</a> |
| 81  | DE-RuS    | 50.87 | 6.45   | 2011      | 2014    | <a href="https://doi.org/10.18140/flx/1440216">https://doi.org/10.18140/flx/1440216</a> |
| 82  | DE-Seh    | 50.87 | 6.45   | 2007      | 2010    | <a href="https://doi.org/10.18140/flx/1440217">https://doi.org/10.18140/flx/1440217</a> |
| 83  | DE-SfN    | 47.81 | 11.33  | 2012      | 2014    | <a href="https://doi.org/10.18140/flx/1440219">https://doi.org/10.18140/flx/1440219</a> |
| 84  | DE-Spw    | 51.89 | 14.03  | 2010      | 2014    | <a href="https://doi.org/10.18140/flx/1440220">https://doi.org/10.18140/flx/1440220</a> |
| 85  | DE-Tha    | 50.96 | 13.57  | 1996      | 2014    | <a href="https://doi.org/10.18140/flx/1440152">https://doi.org/10.18140/flx/1440152</a> |
| 86  | DE-Zrk    | 53.88 | 12.89  | 2013      | 2014    | <a href="https://doi.org/10.18140/flx/1440221">https://doi.org/10.18140/flx/1440221</a> |
| 87  | DK-Eng    | 55.69 | 12.19  | 2005      | 2008    | <a href="https://doi.org/10.18140/flx/1440153">https://doi.org/10.18140/flx/1440153</a> |
| 88  | DK-Fou    | 56.48 | 9.59   | 2005      | 2005    | <a href="https://doi.org/10.18140/flx/1440154">https://doi.org/10.18140/flx/1440154</a> |
| 89  | DK-Sor    | 55.49 | 11.64  | 1996      | 2014    | <a href="https://doi.org/10.18140/flx/1440155">https://doi.org/10.18140/flx/1440155</a> |
| 90  | ES-Amo    | 36.83 | -2.25  | 2007      | 2012    | <a href="https://doi.org/10.18140/flx/1440156">https://doi.org/10.18140/flx/1440156</a> |
| 91  | ES-LgS    | 37.10 | -2.97  | 2007      | 2009    | <a href="https://doi.org/10.18140/flx/1440225">https://doi.org/10.18140/flx/1440225</a> |
| 92  | ES-LJu    | 36.93 | -2.75  | 2004      | 2013    | <a href="https://doi.org/10.18140/flx/1440157">https://doi.org/10.18140/flx/1440157</a> |
| 93  | ES-Ln2    | 36.97 | -3.48  | 2009      | 2009    | <a href="https://doi.org/10.18140/flx/1440226">https://doi.org/10.18140/flx/1440226</a> |
| 94  | FI-Hyy    | 61.85 | 24.30  | 1996      | 2014    | <a href="https://doi.org/10.18140/flx/1440158">https://doi.org/10.18140/flx/1440158</a> |
| 95  | FI-Jok    | 60.90 | 23.51  | 2000      | 2003    | <a href="https://doi.org/10.18140/flx/1440159">https://doi.org/10.18140/flx/1440159</a> |
| 96  | FI-Let    | 60.64 | 23.96  | 2009      | 2012    | <a href="https://doi.org/10.18140/flx/1440227">https://doi.org/10.18140/flx/1440227</a> |

| <b>No.</b> | <b>FLUXNETID</b> | <b>Lat</b> | <b>Lon</b> | <b>BeginYear</b> | <b>EndYear</b> | <b>DOI</b>                                                                              |
|------------|------------------|------------|------------|------------------|----------------|-----------------------------------------------------------------------------------------|
| 97         | FI-Lom           | 68.00      | 24.21      | 2007             | 2009           | <a href="https://doi.org/10.18140/flx/1440228">https://doi.org/10.18140/flx/1440228</a> |
| 98         | FI-Sod           | 67.36      | 26.64      | 2001             | 2014           | <a href="https://doi.org/10.18140/flx/1440160">https://doi.org/10.18140/flx/1440160</a> |
| 99         | FR-Fon           | 48.48      | 2.78       | 2005             | 2014           | <a href="https://doi.org/10.18140/flx/1440161">https://doi.org/10.18140/flx/1440161</a> |
| 100        | FR-Gri           | 48.84      | 1.95       | 2004             | 2014           | <a href="https://doi.org/10.18140/flx/1440162">https://doi.org/10.18140/flx/1440162</a> |
| 101        | FR-LBr           | 44.72      | -0.77      | 1996             | 2008           | <a href="https://doi.org/10.18140/flx/1440163">https://doi.org/10.18140/flx/1440163</a> |
| 102        | FR-Pue           | 43.74      | 3.60       | 2000             | 2014           | <a href="https://doi.org/10.18140/flx/1440164">https://doi.org/10.18140/flx/1440164</a> |
| 103        | GF-Guy           | 5.28       | -52.92     | 2004             | 2014           | <a href="https://doi.org/10.18140/flx/1440165">https://doi.org/10.18140/flx/1440165</a> |
| 104        | GH-Ank           | 5.27       | -2.69      | 2011             | 2014           | <a href="https://doi.org/10.18140/flx/1440229">https://doi.org/10.18140/flx/1440229</a> |
| 105        | IT-BCi           | 40.52      | 14.96      | 2004             | 2014           | <a href="https://doi.org/10.18140/flx/1440166">https://doi.org/10.18140/flx/1440166</a> |
| 106        | IT-CA1           | 42.38      | 12.03      | 2011             | 2014           | <a href="https://doi.org/10.18140/flx/1440230">https://doi.org/10.18140/flx/1440230</a> |
| 107        | IT-CA2           | 42.38      | 12.03      | 2011             | 2014           | <a href="https://doi.org/10.18140/flx/1440231">https://doi.org/10.18140/flx/1440231</a> |
| 108        | IT-CA3           | 42.38      | 12.02      | 2011             | 2014           | <a href="https://doi.org/10.18140/flx/1440232">https://doi.org/10.18140/flx/1440232</a> |
| 109        | IT-Col           | 41.85      | 13.59      | 1996             | 2014           | <a href="https://doi.org/10.18140/flx/1440167">https://doi.org/10.18140/flx/1440167</a> |
| 110        | IT-Cp2           | 41.70      | 12.36      | 2012             | 2014           | <a href="https://doi.org/10.18140/flx/1440233">https://doi.org/10.18140/flx/1440233</a> |
| 111        | IT-Cpz           | 41.71      | 12.38      | 1997             | 2009           | <a href="https://doi.org/10.18140/flx/1440168">https://doi.org/10.18140/flx/1440168</a> |
| 112        | IT-Isp           | 45.81      | 8.63       | 2013             | 2014           | <a href="https://doi.org/10.18140/flx/1440234">https://doi.org/10.18140/flx/1440234</a> |
| 113        | IT-La2           | 45.95      | 11.29      | 2000             | 2002           | <a href="https://doi.org/10.18140/flx/1440235">https://doi.org/10.18140/flx/1440235</a> |
| 114        | IT-Lav           | 45.96      | 11.28      | 2003             | 2014           | <a href="https://doi.org/10.18140/flx/1440169">https://doi.org/10.18140/flx/1440169</a> |
| 115        | IT-MBo           | 46.01      | 11.05      | 2003             | 2013           | <a href="https://doi.org/10.18140/flx/1440170">https://doi.org/10.18140/flx/1440170</a> |
| 116        | IT-Noe           | 40.61      | 8.15       | 2004             | 2014           | <a href="https://doi.org/10.18140/flx/1440171">https://doi.org/10.18140/flx/1440171</a> |
| 117        | IT-PT1           | 45.20      | 9.06       | 2002             | 2004           | <a href="https://doi.org/10.18140/flx/1440172">https://doi.org/10.18140/flx/1440172</a> |
| 118        | IT-Ren           | 46.59      | 11.43      | 1998             | 2013           | <a href="https://doi.org/10.18140/flx/1440173">https://doi.org/10.18140/flx/1440173</a> |
| 119        | IT-Ro1           | 42.41      | 11.93      | 2000             | 2008           | <a href="https://doi.org/10.18140/flx/1440174">https://doi.org/10.18140/flx/1440174</a> |
| 120        | IT-Ro2           | 42.39      | 11.92      | 2002             | 2012           | <a href="https://doi.org/10.18140/flx/1440175">https://doi.org/10.18140/flx/1440175</a> |
| 121        | IT-SR2           | 43.73      | 10.29      | 2013             | 2014           | <a href="https://doi.org/10.18140/flx/1440236">https://doi.org/10.18140/flx/1440236</a> |
| 122        | IT-SRo           | 43.73      | 10.28      | 1999             | 2012           | <a href="https://doi.org/10.18140/flx/1440176">https://doi.org/10.18140/flx/1440176</a> |
| 123        | IT-Tor           | 45.84      | 7.58       | 2008             | 2014           | <a href="https://doi.org/10.18140/flx/1440237">https://doi.org/10.18140/flx/1440237</a> |
| 124        | JP-MBF           | 44.39      | 142.32     | 2003             | 2005           | <a href="https://doi.org/10.18140/flx/1440238">https://doi.org/10.18140/flx/1440238</a> |
| 125        | JP-SMF           | 35.26      | 137.08     | 2002             | 2006           | <a href="https://doi.org/10.18140/flx/1440239">https://doi.org/10.18140/flx/1440239</a> |
| 126        | MY-PSO           | 2.97       | 102.31     | 2003             | 2009           | <a href="https://doi.org/10.18140/flx/1440240">https://doi.org/10.18140/flx/1440240</a> |
| 127        | NL-Hor           | 52.24      | 5.07       | 2004             | 2011           | <a href="https://doi.org/10.18140/flx/1440177">https://doi.org/10.18140/flx/1440177</a> |
| 128        | NL-Loo           | 52.17      | 5.74       | 1996             | 2014           | <a href="https://doi.org/10.18140/flx/1440178">https://doi.org/10.18140/flx/1440178</a> |
| 129        | PA-SPs           | 9.31       | -79.63     | 2007             | 2009           | <a href="https://doi.org/10.18140/flx/1440179">https://doi.org/10.18140/flx/1440179</a> |
| 130        | RU-Che           | 68.61      | 161.34     | 2002             | 2005           | <a href="https://doi.org/10.18140/flx/1440181">https://doi.org/10.18140/flx/1440181</a> |
| 131        | RU-Cok           | 70.83      | 147.49     | 2003             | 2014           | <a href="https://doi.org/10.18140/flx/1440182">https://doi.org/10.18140/flx/1440182</a> |
| 132        | RU-Fyo           | 56.46      | 32.92      | 1998             | 2014           | <a href="https://doi.org/10.18140/flx/1440183">https://doi.org/10.18140/flx/1440183</a> |
| 133        | RU-Ha1           | 54.73      | 90.00      | 2002             | 2004           | <a href="https://doi.org/10.18140/flx/1440184">https://doi.org/10.18140/flx/1440184</a> |
| 134        | SD-Dem           | 13.28      | 30.48      | 2005             | 2009           | <a href="https://doi.org/10.18140/flx/1440186">https://doi.org/10.18140/flx/1440186</a> |
| 135        | SN-Dhr           | 15.40      | -15.43     | 2010             | 2013           | <a href="https://doi.org/10.18140/flx/1440246">https://doi.org/10.18140/flx/1440246</a> |
| 136        | US-AR1           | 36.43      | -99.42     | 2009             | 2012           | <a href="https://doi.org/10.18140/flx/1440103">https://doi.org/10.18140/flx/1440103</a> |
| 137        | US-AR2           | 36.64      | -99.60     | 2009             | 2012           | <a href="https://doi.org/10.18140/flx/1440104">https://doi.org/10.18140/flx/1440104</a> |
| 138        | US-ARb           | 35.55      | -98.04     | 2005             | 2006           | <a href="https://doi.org/10.18140/flx/1440064">https://doi.org/10.18140/flx/1440064</a> |
| 139        | US-ARc           | 35.55      | -98.04     | 2005             | 2006           | <a href="https://doi.org/10.18140/flx/1440065">https://doi.org/10.18140/flx/1440065</a> |
| 140        | US-ARM           | 36.61      | -97.49     | 2003             | 2012           | <a href="https://doi.org/10.18140/flx/1440066">https://doi.org/10.18140/flx/1440066</a> |
| 141        | US-Atq           | 70.47      | -157.41    | 2003             | 2008           | <a href="https://doi.org/10.18140/flx/1440067">https://doi.org/10.18140/flx/1440067</a> |
| 142        | US-Blo           | 38.90      | -120.63    | 1997             | 2007           | <a href="https://doi.org/10.18140/flx/1440068">https://doi.org/10.18140/flx/1440068</a> |
| 143        | US-Cop           | 38.09      | -109.39    | 2001             | 2007           | <a href="https://doi.org/10.18140/flx/1440100">https://doi.org/10.18140/flx/1440100</a> |
| 144        | US-CRT           | 41.63      | -83.35     | 2011             | 2013           | <a href="https://doi.org/10.18140/flx/1440117">https://doi.org/10.18140/flx/1440117</a> |
| 145        | US-GBT           | 41.37      | -106.24    | 1999             | 2006           | <a href="https://doi.org/10.18140/flx/1440118">https://doi.org/10.18140/flx/1440118</a> |
| 146        | US-GLE           | 41.37      | -106.24    | 2004             | 2014           | <a href="https://doi.org/10.18140/flx/1440069">https://doi.org/10.18140/flx/1440069</a> |

| <b>No.</b> | <b>FLUXNETID</b> | <b>Lat</b> | <b>Lon</b> | <b>BeginYear</b> | <b>EndYear</b> | <b>DOI</b>                                                                              |
|------------|------------------|------------|------------|------------------|----------------|-----------------------------------------------------------------------------------------|
| 147        | US-Goo           | 34.25      | -89.87     | 2002             | 2006           | <a href="https://doi.org/10.18140/flx/1440070">https://doi.org/10.18140/flx/1440070</a> |
| 148        | US-Ha1           | 42.54      | -72.17     | 1991             | 2012           | <a href="https://doi.org/10.18140/flx/1440071">https://doi.org/10.18140/flx/1440071</a> |
| 149        | US-IB2           | 41.84      | -88.24     | 2004             | 2011           | <a href="https://doi.org/10.18140/flx/1440072">https://doi.org/10.18140/flx/1440072</a> |
| 150        | US-Ivo           | 68.49      | -155.75    | 2004             | 2007           | <a href="https://doi.org/10.18140/flx/1440073">https://doi.org/10.18140/flx/1440073</a> |
| 151        | US-KS1           | 28.46      | -80.67     | 2002             | 2002           | <a href="https://doi.org/10.18140/flx/1440074">https://doi.org/10.18140/flx/1440074</a> |
| 152        | US-KS2           | 28.61      | -80.67     | 2003             | 2006           | <a href="https://doi.org/10.18140/flx/1440075">https://doi.org/10.18140/flx/1440075</a> |
| 153        | US-Lin           | 36.36      | -119.84    | 2009             | 2010           | <a href="https://doi.org/10.18140/flx/1440107">https://doi.org/10.18140/flx/1440107</a> |
| 154        | US-Los           | 46.08      | -89.98     | 2000             | 2014           | <a href="https://doi.org/10.18140/flx/1440076">https://doi.org/10.18140/flx/1440076</a> |
| 155        | US-LWW           | 34.96      | -97.98     | 1997             | 1998           | <a href="https://doi.org/10.18140/flx/1440077">https://doi.org/10.18140/flx/1440077</a> |
| 156        | US-Me1           | 44.58      | -121.50    | 2004             | 2005           | <a href="https://doi.org/10.18140/flx/1440078">https://doi.org/10.18140/flx/1440078</a> |
| 157        | US-Me2           | 44.45      | -121.56    | 2002             | 2014           | <a href="https://doi.org/10.18140/flx/1440079">https://doi.org/10.18140/flx/1440079</a> |
| 158        | US-Me3           | 44.32      | -121.61    | 2004             | 2009           | <a href="https://doi.org/10.18140/flx/1440080">https://doi.org/10.18140/flx/1440080</a> |
| 159        | US-Me4           | 44.50      | -121.62    | 1996             | 2000           | <a href="https://doi.org/10.18140/flx/1440081">https://doi.org/10.18140/flx/1440081</a> |
| 160        | US-Me5           | 44.44      | -121.57    | 2000             | 2002           | <a href="https://doi.org/10.18140/flx/1440082">https://doi.org/10.18140/flx/1440082</a> |
| 161        | US-Me6           | 44.32      | -121.61    | 2010             | 2014           | <a href="https://doi.org/10.18140/flx/1440099">https://doi.org/10.18140/flx/1440099</a> |
| 162        | US-MMS           | 39.32      | -86.41     | 1999             | 2014           | <a href="https://doi.org/10.18140/flx/1440083">https://doi.org/10.18140/flx/1440083</a> |
| 163        | US-Myb           | 38.05      | -121.77    | 2010             | 2014           | <a href="https://doi.org/10.18140/flx/1440105">https://doi.org/10.18140/flx/1440105</a> |
| 164        | US-Ne1           | 41.17      | -96.48     | 2001             | 2013           | <a href="https://doi.org/10.18140/flx/1440084">https://doi.org/10.18140/flx/1440084</a> |
| 165        | US-Ne2           | 41.16      | -96.47     | 2001             | 2013           | <a href="https://doi.org/10.18140/flx/1440085">https://doi.org/10.18140/flx/1440085</a> |
| 166s       | US-Ne3           | 41.18      | -96.44     | 2001             | 2013           | <a href="https://doi.org/10.18140/flx/1440086">https://doi.org/10.18140/flx/1440086</a> |
| 167        | US-NR1           | 40.03      | -105.55    | 1998             | 2014           | <a href="https://doi.org/10.18140/flx/1440087">https://doi.org/10.18140/flx/1440087</a> |
| 168        | US-Oho           | 41.55      | -83.84     | 2004             | 2013           | <a href="https://doi.org/10.18140/flx/1440088">https://doi.org/10.18140/flx/1440088</a> |
| 169        | US-ORv           | 40.02      | -83.02     | 2011             | 2011           | <a href="https://doi.org/10.18140/flx/1440102">https://doi.org/10.18140/flx/1440102</a> |
| 170s       | US-PFa           | 45.95      | -90.27     | 1995             | 2014           | <a href="https://doi.org/10.18140/flx/1440089">https://doi.org/10.18140/flx/1440089</a> |
| 171        | US-Prr           | 65.12      | -147.49    | 2010             | 2014           | <a href="https://doi.org/10.18140/flx/1440113">https://doi.org/10.18140/flx/1440113</a> |
| 172        | US-SRC           | 31.91      | -110.84    | 2008             | 2014           | <a href="https://doi.org/10.18140/flx/1440098">https://doi.org/10.18140/flx/1440098</a> |
| 173        | US-SRG           | 31.79      | -110.83    | 2008             | 2014           | <a href="https://doi.org/10.18140/flx/1440114">https://doi.org/10.18140/flx/1440114</a> |
| 174        | US-SRM           | 31.82      | -110.87    | 2004             | 2014           | <a href="https://doi.org/10.18140/flx/1440090">https://doi.org/10.18140/flx/1440090</a> |
| 175        | US-Sta           | 41.40      | -106.80    | 2005             | 2009           | <a href="https://doi.org/10.18140/flx/1440115">https://doi.org/10.18140/flx/1440115</a> |
| 176        | US-Syv           | 46.24      | -89.35     | 2001             | 2014           | <a href="https://doi.org/10.18140/flx/1440091">https://doi.org/10.18140/flx/1440091</a> |
| 177        | US-Ton           | 38.43      | -120.97    | 2001             | 2014           | <a href="https://doi.org/10.18140/flx/1440092">https://doi.org/10.18140/flx/1440092</a> |
| 178        | US-Tw1           | 38.11      | -121.65    | 2012             | 2014           | <a href="https://doi.org/10.18140/flx/1440108">https://doi.org/10.18140/flx/1440108</a> |
| 179        | US-Tw2           | 38.10      | -121.64    | 2012             | 2013           | <a href="https://doi.org/10.18140/flx/1440109">https://doi.org/10.18140/flx/1440109</a> |
| 180        | US-Tw3           | 38.12      | -121.65    | 2013             | 2014           | <a href="https://doi.org/10.18140/flx/1440110">https://doi.org/10.18140/flx/1440110</a> |
| 181        | US-Tw4           | 38.10      | -121.64    | 2013             | 2014           | <a href="https://doi.org/10.18140/flx/1440111">https://doi.org/10.18140/flx/1440111</a> |
| 182        | US-Twt           | 38.11      | -121.65    | 2009             | 2014           | <a href="https://doi.org/10.18140/flx/1440106">https://doi.org/10.18140/flx/1440106</a> |
| 183        | US-UMB           | 45.56      | -84.71     | 2000             | 2014           | <a href="https://doi.org/10.18140/flx/1440093">https://doi.org/10.18140/flx/1440093</a> |
| 184        | US-UMd           | 45.56      | -84.70     | 2007             | 2014           | <a href="https://doi.org/10.18140/flx/1440101">https://doi.org/10.18140/flx/1440101</a> |
| 185        | US-Var           | 38.41      | -120.95    | 2000             | 2014           | <a href="https://doi.org/10.18140/flx/1440094">https://doi.org/10.18140/flx/1440094</a> |
| 186        | US-WCr           | 45.81      | -90.08     | 1999             | 2014           | <a href="https://doi.org/10.18140/flx/1440095">https://doi.org/10.18140/flx/1440095</a> |
| 187        | US-Whs           | 31.74      | -110.05    | 2007             | 2014           | <a href="https://doi.org/10.18140/flx/1440097">https://doi.org/10.18140/flx/1440097</a> |
| 188        | US-Wi0           | 46.62      | -91.08     | 2002             | 2002           | <a href="https://doi.org/10.18140/flx/1440055">https://doi.org/10.18140/flx/1440055</a> |
| 189        | US-Wi1           | 46.73      | -91.23     | 2003             | 2003           | <a href="https://doi.org/10.18140/flx/1440054">https://doi.org/10.18140/flx/1440054</a> |

**Table S2.** Statistics of the number of data points of different variables with different quality controls in the FLUXNET dataset.

| Data amount                            | $R_{ld}$ | $R_s$    | $e_a$    | $T_a$    |
|----------------------------------------|----------|----------|----------|----------|
| All data                               | 14587695 | 24424933 | 23353543 | 24200040 |
| Data with quality control as 0, 1 or 2 | 13264714 | 22870933 | 21571808 | 22736876 |
| Data with quality control as 0         | 12759714 | 22386602 | 20646599 | 22060360 |

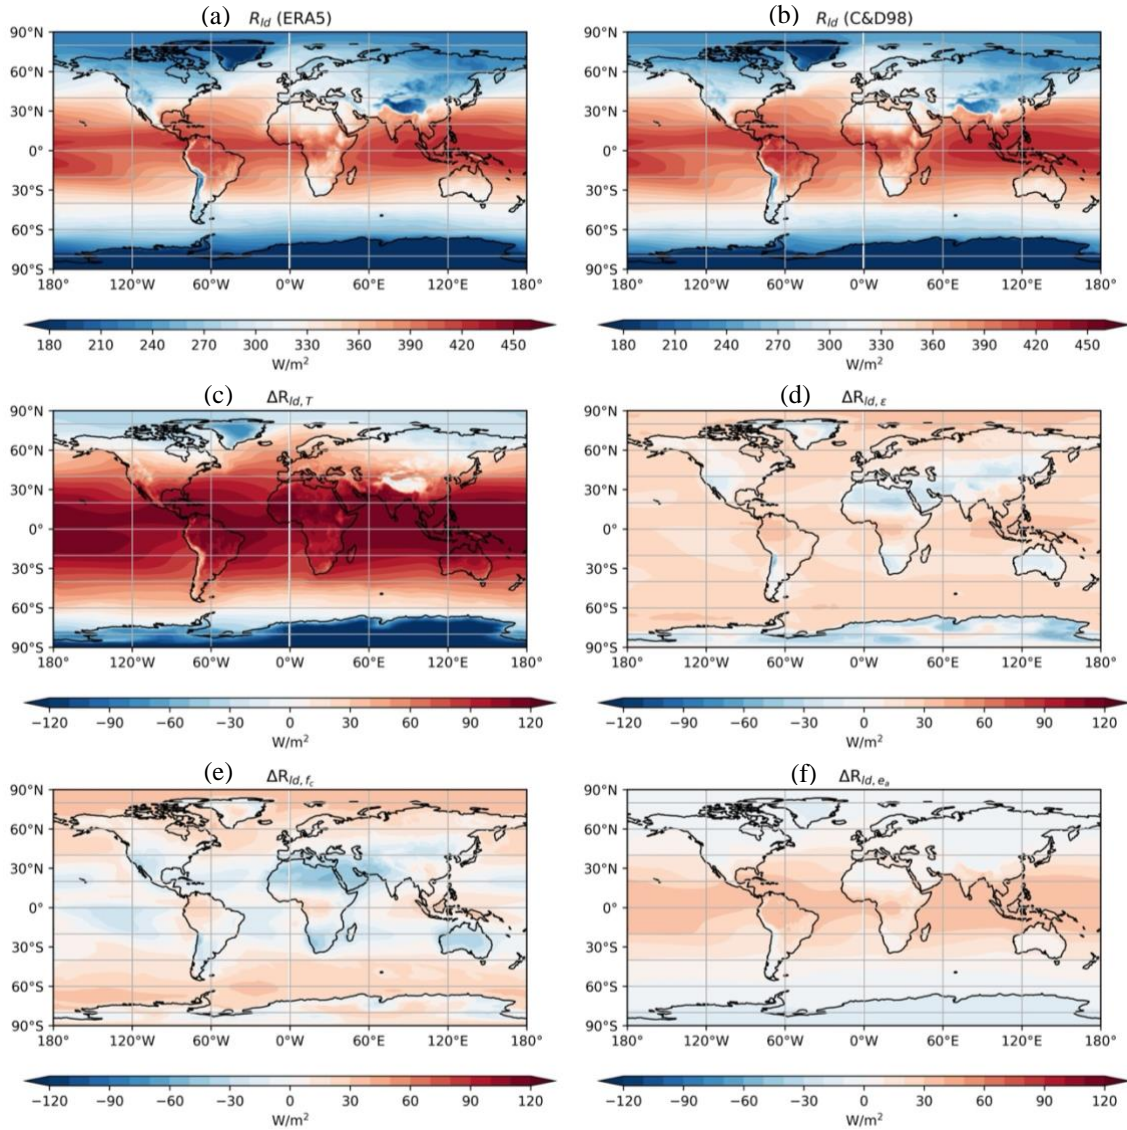

**Figure S1.** (a) same as Figure 1a, but for the ERA5 dataset and (b) as estimated by the equations of Crawford and Duchon (1999). (c-f) same as Figure 6a-d, but for the ERA5 dataset. The ocean part is also presented because all data are available over both land and ocean in ERA5.

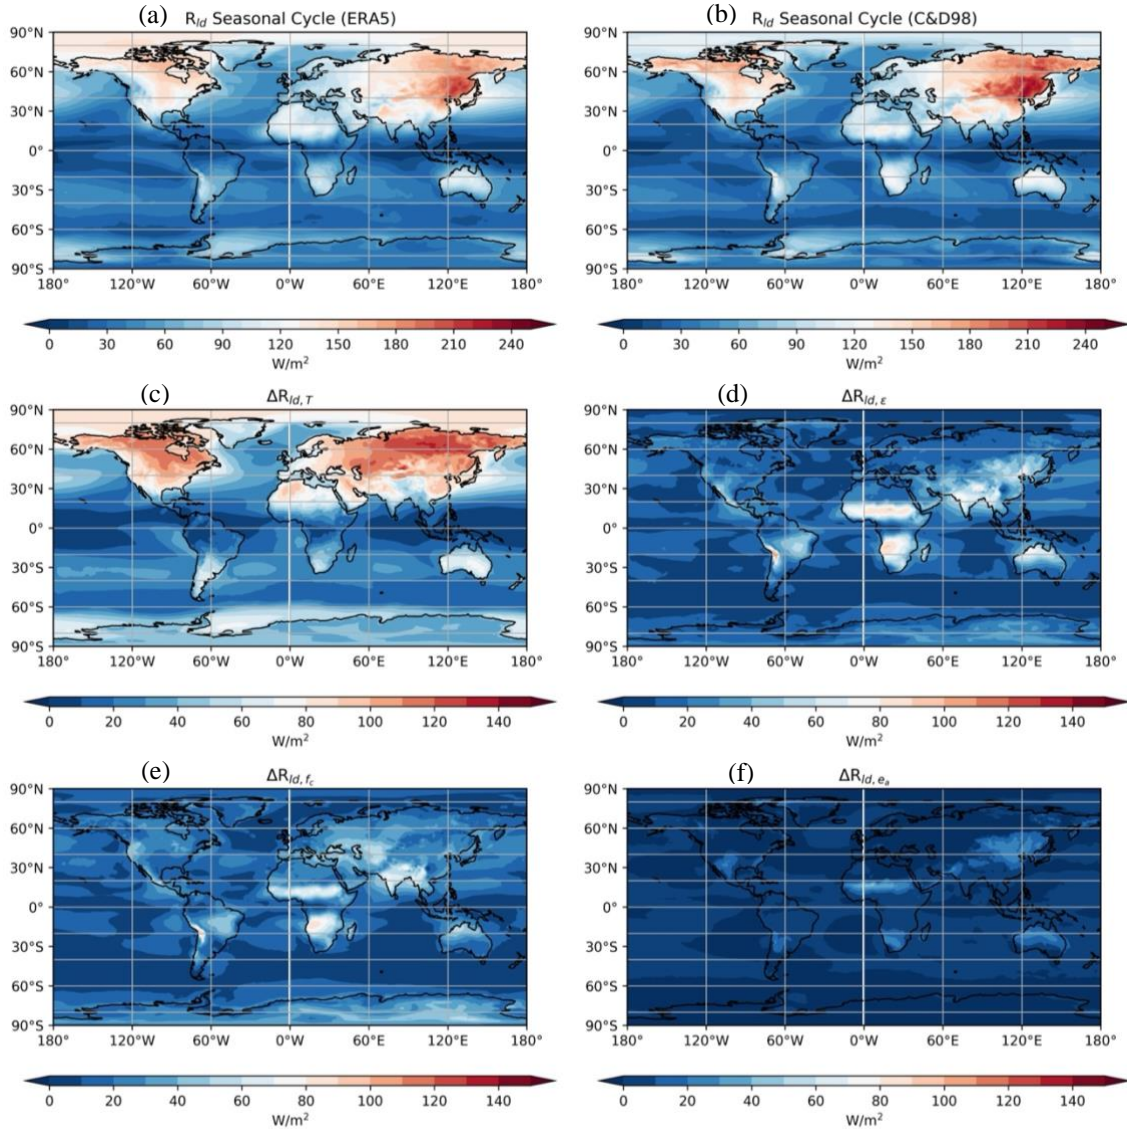

**Figure S2.** (a) same as Figure 1b, but for the ERA5 dataset and (b) as estimated by the equations of Crawford and Duchon (1999). (c-f) same as Figure 5a-d, but for the ERA5 dataset. The ocean part is also presented because all data are available over both land and ocean in ERA5.
